# Supplementary material for: Regressing grasping using force myography: an exploratory study
Source: PubMed Central journal article supplement (PMC6199756; doi:10.1186/s12938-018-0593-2), 2018-10-23
Supplement: 12938_2018_593_MOESM1_ESM.pdf [file 12938_2018_593_MOESM1_ESM.pdf]

## **Additional File2 – Snap Shot of Hand Movement Signal in Different Wrist Positions**

This file includes a sample of the FMG signal in different hand movements and wrist positions. The graphs from top to bottom show the opposed Thumb-Index finger grip, opposed Thumb-Two finger grip, and oppose Heavy Wrap. The sections of the graphs that are number as 1-6 indicate the Extension wrist position, Flexion wrist position, Neutral wrist position, Pronation wrist position, Radial wrist position and Ulnar wrist position. Different colors on the graph indicate the different sensor values.

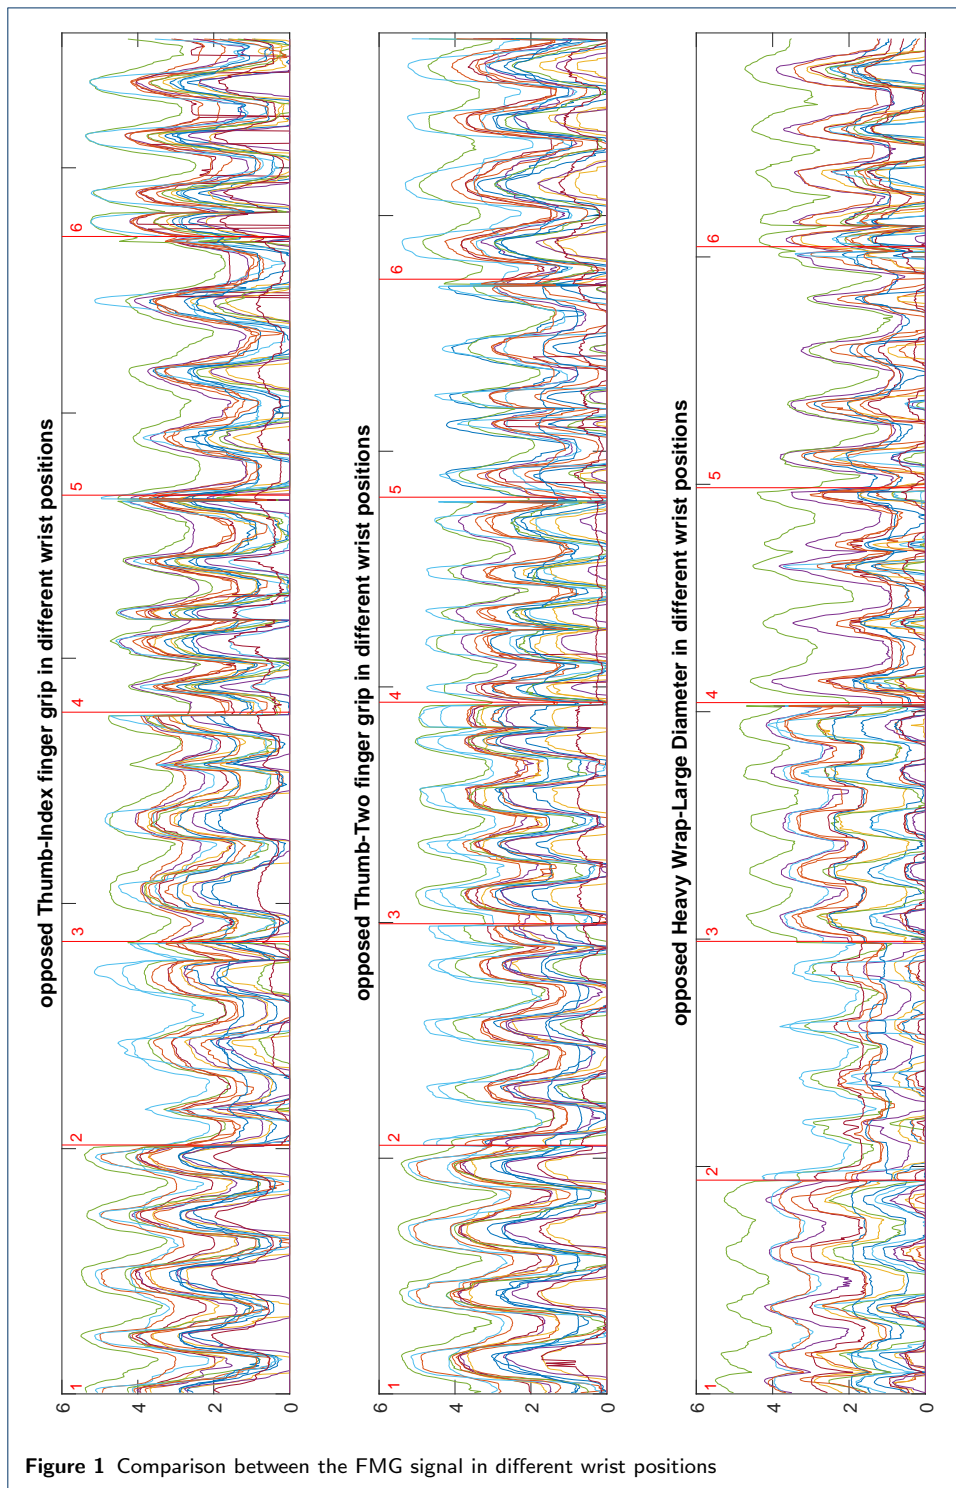

Figure 1 Comparison between the FMG signal in different wrist positions
